# Supplementary material for: Novel Synergistic Anti-Enteroviral Drug Combinations
Source: Preprints.org preprint supplement (doi:10.20944/preprints202208.0039.v1), 2022-08-02
Supplement: Supplementary file 1 [file supplementary]

## Sheet: Analysis Results
DRUG_NAME	EC50	D1	D2	D3	D4	D5	D6	D7	D8	SE_of_estimate	AUC	DSS	GRAPH
Pleconaril	0	104	105.8	96	109	110	109.7	116.8	115.5	23.2	337.7	48.4
Nelfinavir	0	93	110.5	107.7	107.3	105.3	114.4	99.8	80.9	19.7	337.7	48.4
Rupintrivir	0	60.2	73.8	82.8	98.1	97.5	95.7	78.8	61.3	16.3	301.2	42.7
Vemurafenib	0.4	2.8	16.1	32.8	38.6	74.5	99.5	81.7	57.9	25.2	184.2	23.9
Remdesivir	0.6	2	1.9	3	8.9	90.3	116	96.3	69.2	13.9	167.1	23.3
Trametinib	0.7	48.3	37	33.2	32	35.4	35.1	36.7	37	52.5	159.1	20.9
Emetine	0.4	6.4	11.3	29.2	56	52.9	57.3	65.9	60.5	5	152.2	20.8
Cycloheximide	0.7	2.8	1.9	5.1	22.1	75	70.6	87.3	71	8.7	150	20.8
Atovaquone	195.5	14.4	25.8	28.4	34.2	42.9	52.1	45.8	31.9	7.2	122.3	16.3
Homoharringtonine	#NUM!	2.9	8.6	23	34.4	40.4	44.9	39.9	37.6	3.3	105.6	14.2
Salinomycin	4.5	8.4	9.5	10.3	11.9	14.1	21.5	106	77	13.8	81.8	11
Enoxacin	4.9	3.8	3.6	5.1	5.4	7.8	18.4	99.6	106	6.5	78.9	10.6
GSK583	#NUM!	0.2	2	0.1	7.1	28.9	34.5	35.7	22.9	4.9	59.8	8.1
AVN-944	#NUM!	5.6	9	10.2	15.9	22.8	48.9	47.7	8.3	14.6	74.8	7.7
Troglitazone	#NUM!	0.5	2.9	5	25.3	41.2	43.8	19.6	16.7	13.6	72.2	7.5
GC-376	#NUM!	0.7	11.8	10.6	16.7	26.2	27.5	25	27.7	2.7	63.2	7
Calanolide A	#NUM!	3.2	2.5	6.7	12.6	10	24	37.2	42.4	3.8	51.5	5.6
Atazanavir	#NUM!	2.4	1.6	4.4	5.9	10.8	19.4	40.9	36.3	3.7	44.3	5.1
Ilaprazole	#NUM!	0.7	0.1	2	4.9	13.4	29	32.3	10.9	8.1	44.6	5
Azauridine	311.9	1.2	1	5.4	6.9	13.2	15.9	30.8	50.9	4.3	43.6	4.6
Ouabain	#NUM!	1.6	6.7	16.4	14.6	13.9	13.7	10.3	10.4	3.6	46.3	4.3
Monensin	272.9	5.1	4.4	4.8	4.8	6.2	31.3	30.7	32	18.6	47.8	3.9
Oritavancin	18.7	3.2	2.9	2.8	3.7	3.8	6.4	31.1	59.1	3.1	30.9	3.8
Amprenavir	#NUM!	3.7	8.7	6.4	5.9	13.6	17.6	27.3	27.5	3.4	42.8	3.7
Podofilox	#NUM!	2.8	2.5	5.8	14.9	16.4	18.2	17	2.6	6.1	40.9	3.7
Bithionol	#NUM!	5.1	1.4	2	8.2	5.2	14.3	35.5	26.6	5	34.8	3.6
Aprotinin	#NUM!	1.8	7.7	10.6	13.1	11.2	18.2	25.2	19.4	2.8	46	3.5
Bexarotene	#NUM!	1.6	1.9	2.3	8.6	4.7	10	28.6	31.5	3.7	27.1	3
Lanatoside C	#NUM!	13.4	12.9	12.2	12	12.4	11.5	11.2	11.1	3	44.5	2.9
Saquinavir	#NUM!	1.8	2.1	14.9	24.2	13.7	13.7	2.7	3.3	16.3	46.3	2.8
Beclabuvir	#NUM!	2.2	1	2	5.2	4.5	0.7	22.7	42.6	2.9	21.3	2.6
Digitoxin	#NUM!	12.3	12	13	12.1	12.9	12	12.9	8.8	2.8	42.9	2.5
ABMA	#NUM!	3.1	6.5	3.7	9.3	9.8	22.5	28.2	9.5	6.5	40	2.5
Anisomycin	34.5	90.3	93.6	84.7	67.5	63	40.7	20.4	15.7	69.6	28.2	2.3
ABT-737	#NUM!	1.4	4.5	8.7	11.6	13.7	8.8	29.3	11.2	6.2	38.6	2
Rilpivirine	#NUM!	1.5	1.2	2.1	2.5	14.8	18.2	37.1	3.5	10.6	36	1.9
N4-Hydroxycytidine (EIDD-1931)	#NUM!	1.4	1	1.5	3.3	10.9	12.4	16.9	22.7	1.5	27.8	1.9
Simeprevir	#NUM!	2.8	3.1	5.5	12.2	15.4	12.8	21.8	2.6	12.1	38.5	1.8
Dapivirine	#NUM!	2.2	1.8	2.9	3.6	1.2	21.6	34.1	6.3	9.7	31.9	1.7
Oubain	#NUM!	12	15	12.2	12.2	12.3	11.4	11	9.9	3.4	37.6	1.2
Mitoxantrone	#NUM!	4.5	3.8	3.4	3.7	4.2	5	10.1	30.8	3.8	12.3	1.2
Merimepodib	#NUM!	1.4	1.4	1.5	1.8	2.4	8.7	21.5	17.3	8.3	21.6	1
n6-(delta 2-isopentenyl)-adenine	#NUM!	2	1.9	1.9	2.9	5.3	9.8	15.8	16.9	1.3	20.3	1
5-Fluorouridine	#NUM!	8.1	3.9	6.7	6.1	6.5	7.8	18.8	17.5	3.6	30.4	0.9
Clozapine	#NUM!	3.8	3.3	3.4	5.4	5.3	2.4	10.9	23.9	3.7	11.5	0.9
SNS-032	#NUM!	2.2	2.1	2.7	2.7	4.5	7.6	22	11.9	3.9	21.6	0.9
Promethazine	#NUM!	0	0.7	1	2.6	32.3	13.5	12.8	0.7	11	31.7	0.9
Adefovir	#NUM!	6.6	8.9	8.3	3.6	6.3	18.2	14	13.1	3.8	33.6	0.8
Triazavirin	#NUM!	4.9	2.2	13.1	39.9	48	41	26	1.7	29	14.4	0.7
Hexachlorophene	#NUM!	2.6	2.6	3.3	3.8	4.7	8.7	14	16.9	1.7	20.5	0.7
Posaconazole	#NUM!	3.3	2.9	2.8	2.5	4.1	8.7	15	14.4	2.1	18.2	0.6
Bleomycin	#NUM!	0.9	1.4	0.8	1.1	1.4	1.8	7.9	17.8	1.1	8.2	0.5
Stanozolol	#NUM!	2.8	1.6	1.6	2	2.4	3.5	10.7	16.3	1.7	11.3	0.4
Clofazimine	#NUM!	0.2	2.7	6.2	1.7	0.4	8.7	7.7	18.4	3.3	14.2	0.4
Obatoclax	#NUM!	2.2	1.8	1.9	2.1	4.1	7.6	9.5	16	1.5	16	0.3
Cucurbit[7]uril	#NUM!	1.9	2	6.6	9.1	1.2	11.8	14.7	10.9	3.3	24.6	0.3
Boceprevir	#NUM!	2.7	5.9	1.8	1.1	2	0.2	12.6	9.4	3.1	9	0.3
Sorafenib	#NUM!	2.6	3	3.3	3.3	5.8	10.4	11	11.2	4.6	21	0.2
Sunitinib	#NUM!	0.5	0.8	1	1.8	1.2	9.5	16.3	6	3.8	15.8	0.2
Pacritinib	#NUM!	3.4	1.9	1.6	1.5	4.9	25	9.2	2.4	7.6	23.2	0.2
Brivudine	#NUM!	1.4	4.8	3.2	4.2	1.7	5.7	10.3	14.3	2.4	16.7	0.1
Gossypol	#NUM!	0.3	10.1	12	18.4	12	19.3	29.3	0.6	15.3	8.8	0.1
Stausporine	#NUM!	2.9	2.1	1.3	1.7	1.6	2.2	3.6	13.1	1.9	4.9	0.1
Abamectin	#NUM!	3.1	1.8	2.2	2.4	1.3	0.9	2.7	12.8	2	4.3	0
Camostat	#NUM!	2.5	2.4	2.6	2.7	2.9	3.4	3.9	4.4	0.3	10.6	0
Kasugamycin	#NUM!	4.7	3	3	3	3.8	3.9	3.5	4.4	0.9	11.6	0
Niclosamide	#NUM!	3	2.5	2.6	2.7	2.7	3.8	3.2	3.9	0.5	10.1	0
Tetracycline	#NUM!	2.7	2.7	2.5	2.7	2.7	3.1	4.5	6.3	0.9	11.5	0
Alenotron	#NUM!	3.3	3.7	2.6	2.9	3.4	3.2	4.3	7.2	3.2	2.2	0
Chicoric acid	#NUM!	2.6	2.5	2.5	2.1	2.4	3.4	3.6	4.8	0.6	10.3	0
Cidofovir	#NUM!	2.4	2	1.9	1.9	1.9	2.8	1.5	1.7	2	0.8	0
Bromhexine	#NUM!	3.7	3	2.9	3.1	3.6	2.6	1.4	1.4	2.9	1.1	0
Ibersartan	#NUM!	2	3.3	2.6	2.6	3.3	3	3.6	5.7	0.7	11.1	0
Bemcentinib	#NUM!	3.1	2.8	2.2	1.7	2	1.5	0.5	0.4	2.1	0.9	0
Cepharanthine	#NUM!	2.8	1.9	6	9.3	8.3	8.3	4.8	6.9	7.4	4.8	0
Opaganib	#NUM!	3.9	2.7	2.8	0.7	2.1	2.5	4.9	6.7	1.6	11	0
Clomipramine	#NUM!	1.9	1.1	1	1.6	6.3	8.8	6.5	6.9	1.4	14.3	0
Efavirenz	#NUM!	1.6	1.8	1.3	2	1.1	1	0.7	5	1.6	1.5	0
Maraviroc	#NUM!	1	2.4	1.1	1.5	1.7	1	4.5	1.4	1.9	1.3	0
Reserpine	#NUM!	1.1	1.9	1.6	0.4	1.9	2.7	3.6	3.2	0.7	6.8	0
Tetrandine	#NUM!	1.6	1.4	1.1	5.5	0.2	1.6	1.3	5.1	2.4	1.7	0
Zalcitabine	#NUM!	2.8	2.4	2.1	1.8	3.4	1.6	9.8	4.5	2.3	11.7	0
Amiloride	#NUM!	2.4	2.5	1.7	1.5	1.6	1.3	1.2	1.2	1.7	0.8	0
Camptothecin	#NUM!	1.2	1.1	1.8	1.5	1.4	2.5	2.5	2.3	0.3	6.1	0
Regorafenib	#NUM!	2.7	2.6	2.4	2.7	2.7	3.3	4.6	3.5	2.7	1.6	0
Ribovirine	#NUM!	3.8	2.7	2.6	2.6	2.5	3.6	4.9	5	3.2	1.5	0
Ascorbic acid	#NUM!	2.6	2.9	2	1.8	3.6	2.4	4.5	6	1	10.8	0
Bromcriptine	#NUM!	4.1	2.6	2.2	2	1.9	2.1	1.8	2.6	2.4	1.2	0
Ranitidine	#NUM!	3	2	1.7	2.1	2.1	2.2	3	3.7	2.2	1.1	0
Daclasavir	#NUM!	3.1	1.1	1	0.9	1.1	1.1	2	2	1.5	0.9	0
EIDD-2801	#NUM!	2.7	1.4	1.8	1.5	2.2	2.1	2.2	3.1	1.9	0.9	0
Cytochalasin d	#NUM!	2.7	0.9	0.9	0.8	1.7	1.1	1.5	1.8	1.4	0.8	0
Benztropine	#NUM!	2.8	4.9	0.9	2.6	5.4	8.8	6.7	8.4	1.9	16.7	0
Clotrimazole	#NUM!	2.9	2.1	3.6	1	2.8	1.2	1.6	9.8	2.3	3.2	0
Eflornithine	#NUM!	1.6	0.7	0.9	2	0.2	6.9	1.1	1.4	2.1	7	0
GSK717	#NUM!	1.1	1.6	1.1	1.2	1.8	1.7	1.8	2.4	0.3	5.4	0
Resveratrol	#NUM!	0.1	2.5	1.4	3.4	2.4	3.1	2	2.8	0.8	8.1	0
Thapsigargin	#NUM!	8.2	6.9	5.8	3.1	3.1	3.8	3.3	8.8	5.3	2.7	0
Zidovudine	#NUM!	2.1	3.2	2.1	2.5	1.9	3	11.6	6.5	2.4	12.9	0
Amiodarone	#NUM!	2.4	3.2	1.7	1.3	1.8	1.2	1	0.8	1.9	1	0
DFMO	#NUM!	2.7	2.6	2.4	2.8	3.6	4.6	3.1	2.6	2.9	1.4	0
Letermovir	#NUM!	2.8	3.1	2.6	3.2	2.8	4	3.3	2.7	2.9	1.2	0
D-pantoprazole	#NUM!	4.9	2.8	2.8	2.9	3	3.4	4.4	4.9	1	11.7	0
Gemcitabine	#NUM!	1.7	2.4	1.6	2.5	3	4.5	7.4	10.9	1.3	12.2	0
Cefoperazone	#NUM!	3.6	2.8	3	3.1	2.9	2.4	2.4	4.3	2.8	1.3	0
Ozanimod	#NUM!	3.3	2	1.8	2.7	2.3	3.7	4.2	1	2.7	1.3	0
Ilomastat	#NUM!	2.3	1.4	1.8	2	2.5	3.3	3.1	4.5	0.6	8.8	0
Pranlukast	#NUM!	2	1.3	0.9	0.8	1	1.2	1.9	5	1.1	5.3	0
Betulinic Acid	#NUM!	1.6	2.1	4.4	3.1	3.5	6.4	6.6	13.6	1.9	16.1	0
Emtricitabine	#NUM!	1.9	1.8	2.2	2.7	2.7	2.2	2.2	2.1	2.1	0.8	0
Halofuginone	#NUM!	17.6	18.2	22.8	21.8	14.4	4.5	2.9	12	16.1	6.9	0
Methotrexate	#NUM!	1.7	0.6	1.5	4.3	0.6	1.1	0.8	0.5	2	1.3	0
Thioridazine	#NUM!	2.6	0.1	7.3	3.5	1.2	1.4	3	10.5	3.2	12.1	0
Cobicistat	#NUM!	2.1	1.3	0.6	2.4	2.1	2.5	1.1	8.4	1.9	7.2	0
Amodiaquine	#NUM!	3.4	3.1	2.7	1.7	2.8	2	2.1	2.6	2.5	1	0
Diphyllin	#NUM!	2.9	2.7	4.8	4.6	6.7	6.2	6.4	7.8	0.6	18.1	0
Lobucavir	#NUM!	3.2	2.4	3.4	2.3	3.5	3.6	3.3	3.5	0.7	10.4	0
Sofosbuvir	#NUM!	2.4	3.2	2.1	2.7	2.6	3	3.6	5.3	2.7	1.6	0
Zanamivir	#NUM!	3.9	5.2	4.8	5.1	6.2	5.6	6.1	6.2	0.5	18.6	0
Folic acid	#NUM!	5	4	4.6	4.6	4.4	5.4	5.1	5	0.9	15.7	0
Acetylsalicylic acid	#NUM!	2.4	3	2.6	2.1	2.6	4.7	5.9	9.4	1.4	12.9	0
Benidipine	#NUM!	2.3	1.8	1.9	1.8	1.8	1.6	1.5	2.9	1.8	0.9	0
Moxalactam	#NUM!	3.7	4.3	5.2	5.2	5.2	4.2	3.6	5.3	4.4	1.6	0
Bumetanide	#NUM!	2.2	1.7	2	2.1	2.9	3.4	4.4	5.2	0.6	10	0
Osimertinib	#NUM!	2.6	1.5	1.9	2	1.7	1.9	5.1	2	2.2	1.5	0
Marimastat	#NUM!	2.1	1.9	2.1	2	4.7	4.5	4.2	3.9	2	10.9	0
Decitabine	#NUM!	2	1.1	0.9	1	1.2	1.3	1.8	2.9	1.3	0.9	0
Eptifibatide	#NUM!	1.1	1.2	2.4	1.4	2.9	2.9	1.9	2.2	0.5	7.1	0
Hydroxyzine	#NUM!	1.8	16	14.2	20.7	19.2	16.8	5.6	2.5	14.6	6.2	0
Molnupiravir	#NUM!	1.6	0.2	1.8	2.2	3	1.5	2	1.4	1.8	0.9	0
Thymalfasin	#NUM!	0.8	0.1	2.6	4.3	4.6	3.3	2.4	2.7	1.3	9.6	0
Prinomastat	#NUM!	1.4	3.5	3	1.7	1.9	6	11	1.6	5.9	14.9	0
Apilimod	#NUM!	1.3	1.2	2.5	1.4	1.9	2.2	2.2	4.7	0.8	7.2	0
Lopinavir	#NUM!	2.9	2.6	2.3	3.1	3.3	4.9	7	9.1	1.2	14.2	0
Quinine	#NUM!	2.9	2.5	1.9	3	2.3	2.5	2.5	1.9	0.7	7.6	0
Genistin	#NUM!	6.8	7.7	7.7	7.9	9.5	8.6	9.2	10.2	7.6	3.7	0
Flavopiridol	#NUM!	6.7	6	6	6.3	6.7	6.6	7	7.9	1.1	21.8	0
Aciclovir	#NUM!	2.2	2.7	1.6	2.2	2.4	3.8	3.8	4	0.6	9.7	0
Dalbavancin	#NUM!	2.4	1.8	2.1	3	5.3	7	7.8	7	0.9	14.9	0
Dexmedetomidine	#NUM!	2.5	1.1	1	0.8	1.1	1.2	1.8	3.7	1.4	1.1	0
Amantadine	#NUM!	5.7	5	7.3	5.5	8.9	12.1	17	1.4	8.7	5.1	0
Daclatasvir	#NUM!	2.6	7.4	7.1	0.3	2.4	11.3	13.5	8.1	3.9	22.2	0
Etanercept	#NUM!	0.6	1.4	1.1	9.5	9.7	4.7	2.5	0.5	5.5	2.9	0
Idoxuridine	#NUM!	1.5	1.4	2.8	2.1	2.5	2.7	1.4	0.9	2	0.8	0
Tipranavir	#NUM!	0.9	2	2.5	5.8	5.2	3.7	3.5	3.4	1.3	12	0
Arbidol	#NUM!	2.8	3.2	2.3	2.2	2	3	2.8	5.4	2.6	1.6	0
Emodin	#NUM!	4.1	2.8	3.5	6.3	5.5	7.2	8.2	11.9	1.3	20.7	0
Luteolin	#NUM!	3.9	2.5	3.8	2.6	3.8	3.1	3.3	4.5	0.8	11.1	0
Raloxifene	#NUM!	2.1	3.3	3	3	4.1	4.2	4.6	4.8	0.4	12.6	0
Azacytidine	#NUM!	4.5	3.5	3	2.5	3.5	3.5	3.7	5.1	3.4	1.5	0
atovaquone	#NUM!	2.1	1.6	1.4	1.8	1.9	2	5	7.3	1.2	8.3	0
Benzatropine	#NUM!	3.8	4.6	5.3	5.5	4.7	3.8	3	2.1	4.2	1.7	0
Pralatrexate	#NUM!	2.5	1.2	1.5	2.5	4	5.2	6.5	6	0.9	11.8	0
Ceritinib	#NUM!	2	1.2	0.9	0.8	0.5	0.8	0.3	0.4	1.1	0.6	0
Amitriptyline	#NUM!	7.2	13.4	16.8	23.6	11.2	7.5	1.8	1.8	13.6	7.1	0
Etravirine	#NUM!	1.5	0.8	1.9	2.3	2.3	2.7	2.2	1	1.9	0.8	0
Navitoclax	#NUM!	0.4	0.7	1.8	1.5	12.3	19.6	1.4	0.3	7.2	19.4	0
Saracatinib	#NUM!	2.6	1.5	3.2	3.5	2.8	2.1	3.2	3.2	2.7	1.1	0
Artesunate	#NUM!	2.9	2.8	2.2	2.7	2.2	3.2	3.9	4.8	2.8	1.4	0
4-HPR	#NUM!	2.9	2.8	5.5	4.8	5.1	7	6	10.3	1.2	18.8	0
Manidipine	#NUM!	2.6	2.7	2.9	2.6	2.8	3.3	2.9	5.7	2.7	1.7	0
Azithromycin	#NUM!	2.7	2.4	2.3	1.9	1.9	2.6	2.1	2.5	2.2	0.8	0
lercanidipine	#NUM!	2	1.6	1.1	1	1	0.9	0.9	1.5	1.2	0.6	0
Diltiazem	#NUM!	3.3	2.5	2.7	2.7	2.9	2.8	3	5	2.8	1.5	0
Ciclesonide	#NUM!	2.9	3.1	3.3	3.3	3.4	3.6	5	5.9	0.9	13.1	0
Crizotinib	#NUM!	2.1	1.3	1.1	1.2	0.9	0.8	1.5	3.5	1.3	1.1	0
Darunavir	#NUM!	2.2	3.8	0	3.3	0.6	0.1	2.5	0	2.3	1.1	0
Fludarabine	#NUM!	0.3	2.2	6.4	12.1	4.3	5.1	0.4	2	5.9	3.7	0
Indinavir	#NUM!	1.5	0.6	12.1	2.4	5	3	2.5	0.6	5.4	3.6	0
Nitroprusside	#NUM!	1.8	1.6	0.8	1.2	15.6	1.4	1.8	1.2	5.6	14.7	0
Seliciclib	#NUM!	0.1	1.3	3.3	3.6	3.6	2.4	3.3	2.9	0.5	10	0
BDA-366	#NUM!	2.5	2.5	2.5	3.2	2.5	2.7	3.2	2.1	0.6	9	0
Formoterol	#NUM!	2.8	3.1	3.5	3.5	3.4	4.4	6.3	8.9	1.2	15	0
Maribavir	#NUM!	2.9	3.3	3.2	4.2	3.3	4.3	3.2	7	3.4	2.1	0
Roscovitine	#NUM!	2.1	1.9	2.1	2.4	2	2.2	3.1	4.2	2.2	1.3	0
Galidesivir	#NUM!	2.7	3.2	2	2.6	2.9	2	2.7	3.9	2.5	1.2	0
octocrylene (parsol 340)	#NUM!	2	1.4	1.2	1.3	1.1	1.5	1.6	2.5	1.4	0.7	0
Teriflunomide	#NUM!	2.6	1.8	1.8	1.7	1.6	1.7	2	4.4	1.9	1.3	0
Acetylcysteine	#NUM!	1.8	1.5	2	2.5	3.3	4	3.9	3.9	0.4	9.7	0
Halofantrine	#NUM!	3.3	1.6	1.7	2.7	4.1	5.7	6.1	5.8	1	12.7	0
Vidarabine	#NUM!	1.7	1.8	2.6	4.6	6.5	3.3	2.7	2.8	3.6	2.9	0
Didanosine	#NUM!	1	1	1.7	1.4	5.9	5.2	5.2	9.1	1.2	12.4	0
Fluphenazine	#NUM!	0.5	2.9	18.7	16.8	12.2	6.3	5.8	0	11.1	5.6	0
Inosine	#NUM!	0.6	1	2.8	1.4	3.8	2.3	2.1	0.1	2.2	1.1	0
Penciclovir	#NUM!	0.4	2.6	20	23.1	15.5	1.6	1.5	1.6	13.4	6.9	0
Valganciclovir	#NUM!	0.7	0.3	12.7	24	16.2	16.4	2.7	3.4	13.3	7.2	0
Bepridil	#NUM!	2.2	2.4	2.4	1.8	4.3	3.1	1.6	1.9	2.5	1.3	0
Ganciclovir	#NUM!	3	2.9	3.6	3.5	4.3	4.5	4.1	4.9	0.3	13.1	0
Saikosaponin A	#NUM!	2.5	1.9	2.5	2.4	3	3.5	2.9	2.6	0.5	8.9	0
Pimodivir	#NUM!	3.1	3.8	3.9	3.8	4.2	3.9	4.3	4.8	0.4	13.4	0
Bortezomib	#NUM!	3.2	3.8	2	2.1	3.2	2.2	4	4.5	2.9	1.4	0
permethrin	#NUM!	2.3	1.5	1.2	1.1	0.9	0.9	1.2	4	1.5	1.2	0
Clomiprade	#NUM!	2.6	1.7	1.6	1.4	1.1	1.2	1.1	0.8	1.5	0.8	0
Verdinexor	#NUM!	2.1	3.6	9	13	16.1	12.6	4.3	2.1	9.7	4.9	0
Mandipine	#NUM!	3.4	1.6	1.7	2	2.6	3.1	3.5	5.2	0.9	9.8	0
Digoxin	#NUM!	2.7	23	17.8	19.1	18.1	14.8	15.6	8.3	15.9	6.9	0
Entrectinib	#NUM!	2.5	0.9	1	1.1	1.3	1.3	4.2	2.2	1.8	1.3	0
Diphenhydramine	#NUM!	5.6	3	5.4	2.7	8.8	7.3	6.4	1.8	5.5	2.7	0
Irbesartan	#NUM!	0.7	2	2.9	10.2	8.3	2.9	3	0.4	5.4	3.1	0
Valproic Acid	#NUM!	0.8	1.9	2.8	20.2	17.2	16.1	1	1.9	11.7	6.1	0
Berberine	#NUM!	2.6	3.5	3.6	2	2.3	4.2	5.2	9.2	1.6	13.3	0
Glycyrrhizic acid	#NUM!	2.6	3.1	3.9	3.7	4.9	5.5	5.4	6.6	0.4	15.3	0
Nafamostat	#NUM!	6.3	8.5	9	9.1	9.6	9.9	9.4	9.2	0.7	31.6	0
Brincidofovir	#NUM!	2.3	3	3.4	3.1	2.5	2.2	2.3	2.8	0.7	8.8	0
clofarabine	#NUM!	2.5	0.9	1	2.4	1.8	1.6	1.4	1.6	1.6	0.7	0
Chlorpromazine	#NUM!	2.7	1.7	1.8	1.4	1.6	1.3	1.2	0.9	1.6	0.8	0
Nicotine	#NUM!	2.8	2	2.1	2.9	4.2	5.4	4.2	12.9	2.1	13.9	0
Baricitinib	#NUM!	2.8	1.6	1.6	1.7	1.9	2.1	2.7	5	2.1	2.2	0
Dexamethasone	#NUM!	2.2	2.9	3.1	3.3	3.4	3.6	3.8	4.9	0.3	11.8	0
Docosanol	#NUM!	0.3	1	1.4	5	2.2	1.5	8.3	4.1	2	10.2	0
Genistein	#NUM!	0.9	7.2	13.2	12.2	11.3	12.6	6	1.2	9.6	4	0
JIB-04	#NUM!	1.1	8.9	7.6	1.6	0.8	1.8	1	2	4.6	2.7	0
Prochlorperazine	#NUM!	0.1	0.7	2	2	15.7	10.2	14.5	0.2	6	20.7	0
Stavudine	#NUM!	0.1	1.7	3.8	3.8	0.7	4.3	4.4	6.7	1.5	10.8	0
Brequinar	#NUM!	2.9	2.6	2.4	2.5	2.6	2.9	2.2	3.2	0.6	8.6	0
Suramin	#NUM!	3.1	3.2	2.7	2.6	2.3	2.8	3.6	4.3	2.8	1.3	0
Tilorone	#NUM!	3.3	2.5	2.7	4.2	4.1	5.1	5.3	2.2	3.7	1.6	0
Caffeine	#NUM!	2.8	2.4	3.1	3.3	3.5	2.1	3	2.7	0.7	9.8	0
brilacidine	#NUM!	2.1	1.4	1.3	1.2	1.1	1	1	1.2	1.3	0.6	0
Quinacrine	#NUM!	2.7	1.9	1.5	1.4	1	0.9	7.2	5.1	1.8	8	0
Mefloquine	#NUM!	3.5	2.2	1.7	1.7	1.7	1.9	4.2	1.5	2.3	1.3	0
AG-1478	#NUM!	4.2	1.7	1.8	1.9	2.1	2.5	4.1	6.6	1.5	10.3	0
Clarithromycin	#NUM!	0.1	2.4	5	7.9	6.2	8.1	7.8	0.1	3.1	20.7	0
Doxycycline	#NUM!	3.6	1.8	1.3	2.2	1.7	3	3.1	12.7	2.2	4.6	0
Lapachone	#NUM!	0.4	1.3	5.4	5.8	8.3	0.7	0.4	1.9	4.4	2.5	0
Vesatolimod	#NUM!	0.2	0.9	1.6	4.7	0.5	12.9	11.9	1.3	4.5	15.2	0
Bromocriptine	#NUM!	3.2	2.8	2.8	3.5	3.1	2.9	3.5	4.3	3	1.3	0
Itraconazole	#NUM!	3.9	3.5	3.6	4.4	5.3	6.5	7.8	13.8	1.8	19.8	0
Novobiocin	#NUM!	7.7	10.1	9.4	9.6	9.9	9.9	9.1	8.5	1.3	34	0
Tamoxifen	#NUM!	4.5	3	2.6	3.4	2.8	2.2	1.4	0.5	2.9	1.4	0
Chloroquine	#NUM!	3.8	2.5	2.7	3.3	3.4	4.1	3.8	6.4	3.3	1.9	0
fludarabine	#NUM!	3.2	2.2	2	2	1.9	1.4	0.8	1.2	2	1	0
Toremifene	#NUM!	4.1	2.9	2.3	2.2	2	1.2	0.9	0.5	2.4	1.2	0
Batimastat	#NUM!	4.6	2.7	2.2	2.3	2.5	2.1	2.3	2.3	2.6	1.4	0
Dyphillin	#NUM!	0.6	0.9	5.4	4.7	3.7	3.5	3.1	1.1	3.4	1.6	0
GS-441524	#NUM!	0.2	0.2	1	0.5	0.4	1.2	2.7	2.4	0.5	2.7	0
Lipoic acid	#NUM!	0	0.1	0.1	0.9	0.3	1	0.8	0.7	0.2	1.7	0
Quercetin	#NUM!	2.9	1.4	1.4	1.5	0.7	0.1	0.1	5	1.4	1	0
Telbivudine	#NUM!	0.8	0.4	0.3	0.2	3.5	4.8	1.7	1.3	1.5	5.7	0
